# Supplementary material for: Ticagrelor versus Clopidogrel in Stent-assisted Coil Embolization of Unruptured Intracranial Aneurysms
Source: Research Square preprint supplement (doi:10.21203/rs.3.rs-288126/v1), 2021-03-15
Supplement: Supplementary file 1 [file 1fac0689a389c42de63b0efd.docx]

**Table 3. Thromboembolic events after embolization**

|  | Clopidogrel | Ticagrelor | Total | P value |
| --- | --- | --- | --- | --- |
| Procedure no. | 113 | 40 | 153 |  |
| Acute in stent thrombosis | 2 (1.77%) | 0 | 2 (1.31%) | 0.729 |
| Early ischemic stroke  (< 3 months) * | 3 (2.65%) | 0 | 3 (2.65%) | 0.236 |
| Delay ischemic stroke  (>3 months) | 6 (5.31%) | 3 (7.50%) | 9 (5.88%) | 0.698 |
| Total ischemic stroke | 9 (7.96%) | 3 (7.50%) | 12 (7.84%) | 0.215 |

* Include the acute in stent thrombosis
