# Supplementary material for: Ticagrelor versus Clopidogrel in Stent-assisted Coil Embolization of Unruptured Intracranial Aneurysms
Source: Research Square preprint supplement (doi:10.21203/rs.3.rs-288126/v1), 2021-03-15
Supplement: Supplementary file 3 [file b4b5170d0b53a1b714dc862f.docx]

**Table 4. Bleeding complications in stent-assisted coiling embolizations**

|  | Clopidogrel | Ticagrelor | Total | P value |
| --- | --- | --- | --- | --- |
| Patients no. | 113 | 40 | 153 | NA |
| Major bleeding | 0 | 0 | 0 | NA |
| Minor bleeding | 9 | 4 | 13 | 0.744 |
| Spontaneous skin ecchymosis | 9 | 4 | 13 | 0.744 |
| Epistaxis | 1 | 1 | 2 | 0.456 |
| Hemorrhoids bleeding | 0 | 1 | 1 | 0.261 |
| Total bleeding events | 9 (7.96%) | 4 (10.00%) | 13 (8.50%) | 0.744 |
